# Supplementary material for: Iatrogenic Neonatal Esophageal Perforation: A European Multicentre Review on Management and Outcomes
Source: MDPI journal article supplement (doi:10.3390/children10020217), 2023-01-26
Supplement: s1 [file s1]

# NEONATAL ESOPHAGEAL PERFORATIONS (NEP) STUDY PROTOCOL

January 2014- December 2018 (5 year survey)

Please fill one form per patient. Insert Patient ID\*\* number for London as L1, L2, L3 ....

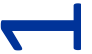

|                                               |                                                          |                                                                                                      |
|-----------------------------------------------|----------------------------------------------------------|------------------------------------------------------------------------------------------------------|
| <b>Participant (Center)</b>                   |                                                          |                                                                                                      |
| <b>Patient ID**</b>                           |                                                          |                                                                                                      |
| <b>Gender (M/F)</b>                           |                                                          |                                                                                                      |
| <b>Gestational age at birth( weeks)</b>       |                                                          |                                                                                                      |
| <b>Weight of patient at birth (grams)</b>     |                                                          |                                                                                                      |
| <b>Associated Anomalies</b>                   | <i>Syndromic patient (Y/N)(If Y- specify)</i>            |                                                                                                      |
|                                               | <i>Cardiac anomalies (Y/N)(If Y- specify)</i>            |                                                                                                      |
|                                               | <i>Musculoskeletal anomalies(Y/N)(If Y- specify)</i>     |                                                                                                      |
|                                               | <i>Gastrointestinal anomalies(Y/N)(If Y- specify)</i>    |                                                                                                      |
|                                               | <i>Urogenital anomalies (Y/N)(If Y- specify)</i>         |                                                                                                      |
|                                               | <i>Others (Y/N)(If Y- specify)</i>                       |                                                                                                      |
| <b>Perforations</b>                           | <i>Days after birth when perforation occurred</i>        |                                                                                                      |
| <b>Respiratory Status (pre - perforation)</b> | <i>Normal breathing (Y/N)</i>                            |                                                                                                      |
|                                               | <i>Ventilated (Y/N)</i>                                  |                                                                                                      |
|                                               | <i>High frequency oscillated ventilation (Y/N)</i>       |                                                                                                      |
|                                               | <i>ECMO (Y/N)</i>                                        |                                                                                                      |
|                                               | <i>Others (please specify)</i>                           |                                                                                                      |
| <b>Perforation &amp; Nasogastric Tube</b>     | <i>OG/NG tube placed immediately after birth (Y/N)</i>   |                                                                                                      |
|                                               | <i>Occurred during first NG tube placement (Y/N)</i>     |                                                                                                      |
|                                               | <i>Occurred during first NG tube change (Y/N)</i>        |                                                                                                      |
|                                               | <i>After multiple NG tube changes (Y/N)</i>              |                                                                                                      |
|                                               | <i>Size of NG tube (if known)</i>                        |                                                                                                      |
| <b>Perforation during anesthesia</b>          | <i>Did perforation occur during anesthesia induction</i> | <div style="display: flex; justify-content: space-between;"> <span>Yes</span> <span>No</span> </div> |
|                                               |                                                          |                                                                                                      |
| <b>Site of perforation (if known)</b>         | <i>Proximal esophagus (Y/N)</i>                          |                                                                                                      |
|                                               | <i>Mid esophagus (Y/N)</i>                               |                                                                                                      |
|                                               | <i>Distal esophagus (Y/N)</i>                            |                                                                                                      |
| <b>Establishment of Clinical Diagnosis</b>    | <i>Recognized during OG/NG tube insertion (Y/N)</i>      |                                                                                                      |
|                                               | <i>Asphyxia after pneumo-mediastinum (Y/N)</i>           |                                                                                                      |
|                                               | <i>Respiratory distress (Y/N)</i>                        |                                                                                                      |
|                                               | <i>Pulmonary infections (Y/N)</i>                        |                                                                                                      |
|                                               | <i>Onset of sepsis/shock (Y/N)</i>                       |                                                                                                      |
| <b>Conservative Management</b>                | <i>Other (please specify)</i>                            |                                                                                                      |
|                                               | <i>Was an OG/NG tube reinserted (Y/N)</i>                |                                                                                                      |
|                                               | <i>- Ultrasound guidance (Y/N)</i>                       |                                                                                                      |
|                                               | <i>- Fluoroscopic guidance(Y/N)</i>                      |                                                                                                      |
|                                               | <i>- Endoscopic guidance (Y/N)</i>                       |                                                                                                      |
|                                               | <i>Chest tube required (Y/N)</i>                         |                                                                                                      |
|                                               | <i>- Duration of chest tube (Y/N)</i>                    |                                                                                                      |
|                                               | <i>Total parenteral nutrition (Y/N)</i>                  |                                                                                                      |
|                                               | <i>- Duration of TPN</i>                                 |                                                                                                      |
|                                               | <i>- Days until start of oral feeds</i>                  |                                                                                                      |
| <i>- Days until full oral feeds</i>           |                                                          |                                                                                                      |

# NEONATAL ESOPHAGEAL PERFORATIONS (NEP) STUDY PROTOCOL

2

|                    |                                |  |
|--------------------|--------------------------------|--|
| <b>Medications</b> | <i>Steroids (Y/N)</i>          |  |
|                    | - <i>If yes specify</i>        |  |
|                    | - <i>If yes duration</i>       |  |
|                    | <i>Antibiotics (Y/N)</i>       |  |
|                    | - <i>If yes specify</i>        |  |
|                    | - <i>If yes duration</i>       |  |
|                    | <i>H2 blockers (Y/N)</i>       |  |
|                    | - <i>If yes specify</i>        |  |
|                    | - <i>If yes duration</i>       |  |
|                    | <i>Other medications (Y/N)</i> |  |
|                    | - <i>If yes specify</i>        |  |
|                    | - <i>If yes duration</i>       |  |

|                |                                                                                        |  |
|----------------|----------------------------------------------------------------------------------------|--|
| <b>Surgery</b> | <i>Was surgery offered (Y/N)</i>                                                       |  |
|                | - <i>If yes specify procedure (e.g. Nitinol stent / Gastrostomy/ Jejunostomy etc.)</i> |  |

|                  |                                            |  |
|------------------|--------------------------------------------|--|
| <b>Morbidity</b> | <i>Esophageal stenosis/stricture (Y/N)</i> |  |
|                  | <i>Pleural effusions (Y/N)</i>             |  |
|                  | <i>Mediastinal abscess formation (Y/N)</i> |  |
|                  | <i>Emphysema (Y/N)</i>                     |  |
|                  | <i>Pericardial effusions (Y/N)</i>         |  |

|                 |                                              |  |
|-----------------|----------------------------------------------|--|
| <b>Outcomes</b> | <i>Survival with minimal morbidity (Y/N)</i> |  |
|                 | <i>Survival with severe morbidity (Y/N)</i>  |  |
|                 | - <i>If yes specify</i>                      |  |
|                 | <i>Asphyxia with severe neurology (Y/N)</i>  |  |

|                                                                   |                                           |  |
|-------------------------------------------------------------------|-------------------------------------------|--|
| <b>Mortality<br/>(If yes, please<br/>answer this<br/>section)</b> | <i>Days from perforation to lethality</i> |  |
|                                                                   | <i>Possible cause of lethal outcome:</i>  |  |
|                                                                   | - <i>Sepsis</i>                           |  |
|                                                                   | - <i>Asphyxia</i>                         |  |
|                                                                   | - <i>Cardiac reasons</i>                  |  |
|                                                                   | - <i>Others (please specify)</i>          |  |
